# Supplementary material for: Different Effects of His‐Au NCs and MES‐Au NCs on the Propagation of Pseudorabies Virus
Source: PubMed Central journal article supplement (PMC6607262; doi:10.1002/gch2.201800030), 2018-06-25
Supplement: GCH2-2-1800030-s001.pdf [file GCH2-2-1800030-s001.pdf]

# Global Challenges

---

Open Access

## Supporting Information

for *Global Challenges*, DOI: 10.1002/gch2.201800030

Different Effects of His-Au NCs and MES-Au NCs on the  
Propagation of Pseudorabies Virus

*Chenchen Feng, Puxian Fang, Yanrong Zhou, Lingzhi Liu,  
Liurong Fang, Shaobo Xiao, and Jiangong Liang\**

DOI: 10.1002/gch2.201800030

## Supporting Information

## Different Effects of His-Au NCs and MES-Au NCs on the Propagation of Pseudorabies

## Virus

Chenchen Feng<sup>‡</sup>, Puxian Fang<sup>‡</sup>, Yanrong Zhou, Lingzhi Liu, Liurong Fang, Shaobo Xiao, Jiangong Liang\*

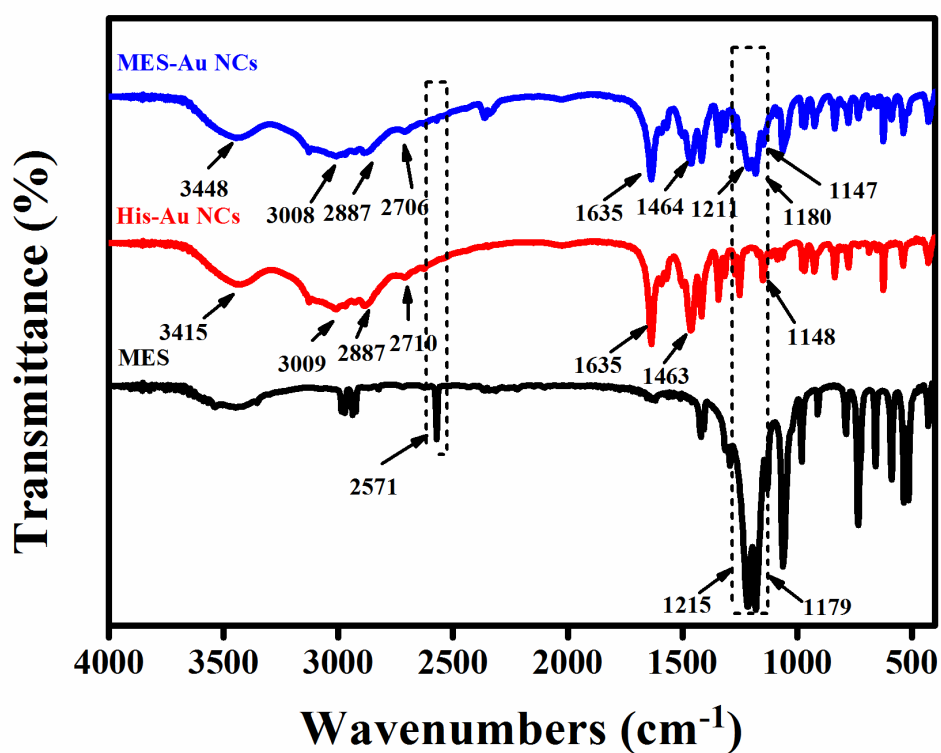

**Figure S1.** The FT-IR spectra of His-Au NCs, MES- Au NCs and MES.

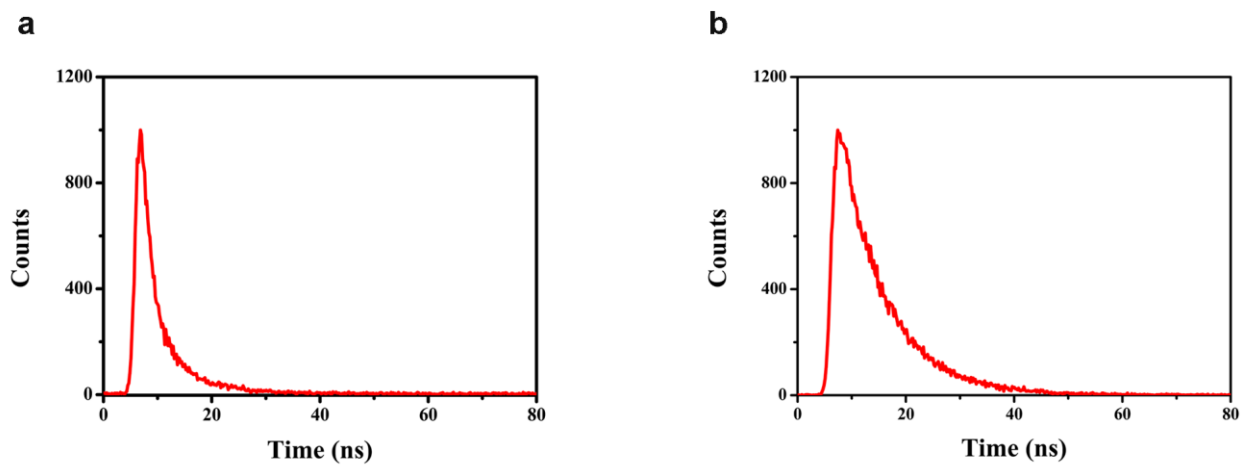

**Figure S2.** The fluorescence decay curves of His-Au NCs (a) and MES- Au NCs (b).

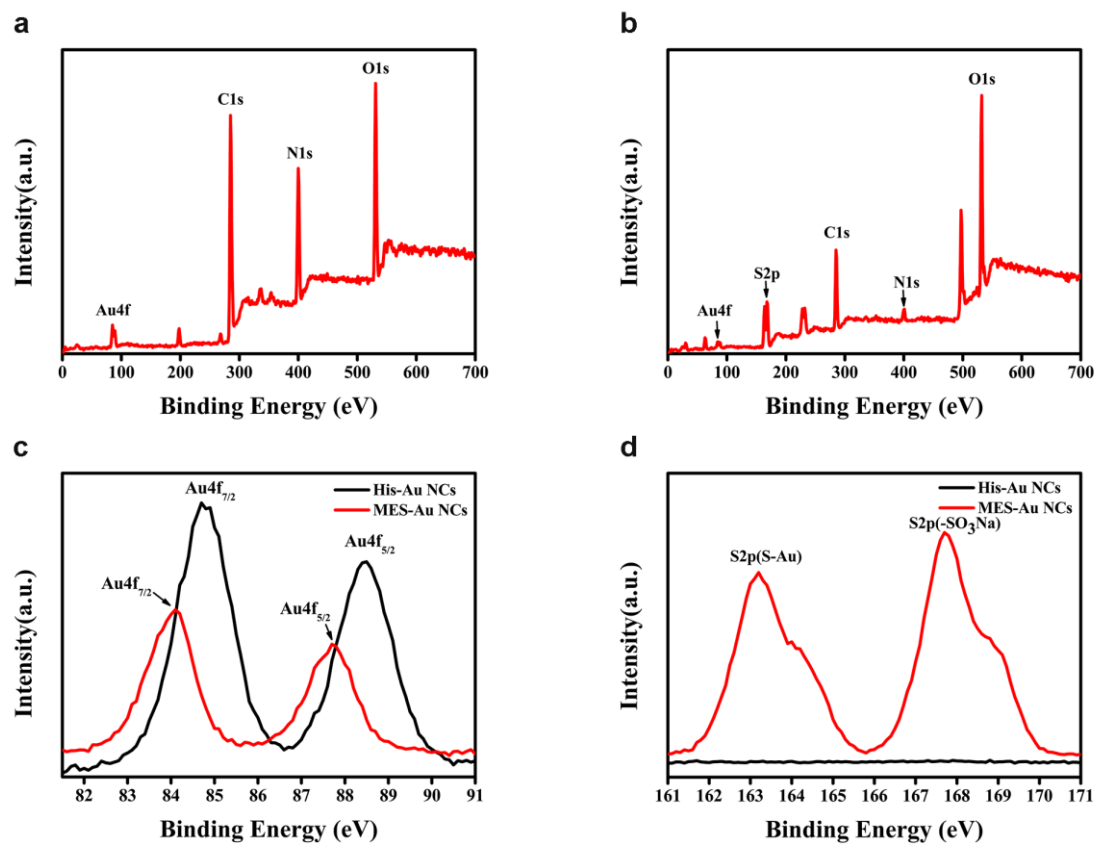

**Figure S3.** XPS spectra of (a) survey spectrum of His-Au NCs, (b) survey spectrum of MES-Au NCs, (c) Au4f region of His-Au NCs and MES-Au NCs, and (d) S2p region of His-Au NCs and MES-Au NCs.

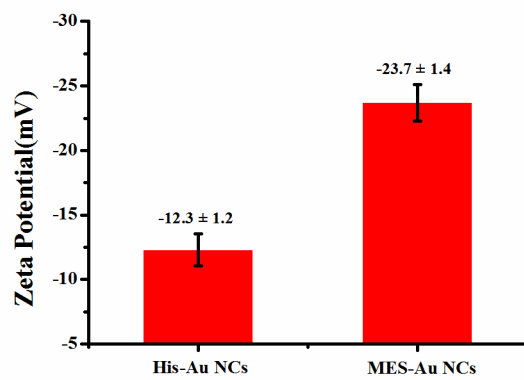

**Figure S4.** Zeta potential of His-Au NCs and MES-Au NCs.
